# Supplementary material
Source: Research Square preprint supplement (doi:10.21203/rs.3.rs-9125548/v1)
Supplement: Supplementary file 1 [file 1c11dbfaa08930b089ec583d.docx]

**Table 1: Patient Demographics and Tumor Characteristics**

| **Variable** | **Number (n=12)** | **Percentage (%)** |
| --- | --- | --- |
| **Gender** |  |  |
| Male | 5 | 41.7% |
| Female | 7 | 58.3% |
| **Mean Age** | 57.5 years | - |
| **Tumor Site** |  |  |
| Tongue | 9 | 75.0% |
| Cheek / Retromolar | 2 | 16.7% |
| Floor of Mouth | 1 | 8.3% |
| **Pathology** |  |  |
| SCC Grade 2 | 7 | 58.3% |
| Other | 5 | 41.7% |

**Table 2: Postoperative Complications and Donor Site Outcomes**

| **Complication / Outcome** | **Frequency (n)** | **Percentage (%)** |
| --- | --- | --- |
| **Flap Survival** |  |  |
| Complete Survival | 9 | 75.0% |
| Partial Loss | 2 | 16.7% |
| Total Loss | 1 | 8.3% |
| **Donor Site Closure** |  |  |
| Primary Closure | 10 | 83.3% |
| Secondary Healing | 2 | 16.7% |
| **Donor Site Morbidity** |  |  |
| Hypertrophic Scar | 7 | 58.3% |
| Wound Dehiscence | 0 | 0.0% |
